# Supplementary material
Source: publisher site journal article supplement (https://www.dovepress.com/article/535881)
Supplement: Supplementary file 1 [file 535881%20Revised%20Supplement%20Table%20S1-S5.docx]

**Supplement Table S1.** Controlling nutritional status (CONUT), score

|  | Normal | Mild | Moderate | Severe |
| --- | --- | --- | --- | --- |
| Albumin(g/dL) | ≥3.5 | 3.0-3.49 | 2.5-2.9 | <2.5 |
| Points | 0 | 2 | 4 | 6 |
| Total lymphocyte count(109/L) | >1.6 | 1.2-1.6 | 0.8-1.2 | <0.8 |
| Points | 0 | 1 | 2 | 3 |
| Total cholesterol(mg/dL) | >180 | 140-180 | 100-139 | <100 |
| Points | 0 | 1 | 2 | 3 |
| Total CONUT score | 0-1 | 2-4 | 5-8 | 9-12 |

**Supplement Table S2.** Unadjusted and adjusted associations of CALLY Index as categorical variable with unfavorable functional outcome

| **Variable** | **Univariable analysis** |  |  | **Multivariable analysis*** |  |
| --- | --- | --- | --- | --- | --- |
| **OR (95% CI)** | ***P*** |  | **OR (95% CI)** | ***P*** |
| CALLY ≥ 0.83 | Ref. |  |  | Ref. |  |
| CALLY < 0.83 | 4.226(2.481-7.199) | <0.001 |  | 2.593(1.331-5.053) | 0.005 |

Abbreviations: OR odds ratio, CI confidence intervals, CALLY Index C-reactive protein-albumin-lymphocyte Index

*Adjusted for sex, age, smoking, NIHSS score, systolic blood pressure, fasting blood glucose, triglycerides, and neutrophils

**Supplement Table S3.** Characteristics of patients with and without early neurologic deterioration

| **Characteristics** | **Non-END(n = 194)** | **END(n = 55)** | ***P*** |
| --- | --- | --- | --- |
| Demographic data |  |  |  |
| Male sex, n (%) | 148 (76.3) | 40 (72.7) | 0.716 |
| Age, y | 61.6 ± 12.0 | 63.9 ± 14.6 | 0.298 |
| BMI, kg/m2 | 24.0 (22.2-26.0) | 23.8 (21.6-25.2) | 0.279 |
| Vascular risk factors, n(%) |  |  |  |
| Hypertension | 123 (63.4) | 37 (67.3) | 0.712 |
| Diabetes mellitus | 61 (31.4) | 18 (32.7) | 0.987 |
| Atrial fibrillation | 38 (19.6) | 9 (16.4) | 0.731 |
| Current smoking | 108 (55.7) | 23 (41.8) | 0.096 |
| Current drinking | 50 (25.8) | 14 (25.5) | 1.000 |
| Previous stroke | 39 (20.1) | 8 (14.5) | 0.463 |
| Clinical assessment |  |  |  |
| NIHSS, score | 10.0 (6.00-16.0) | 13.0 (9.00-17.0) | 0.011 |
| SBP, mmHg | 143 (132-159) | 143 (127-157) | 0.417 |
| DBP, mmHg | 83.9 ± 14.9 | 81.3 ± 11.8 | 0.183 |
| OTT, minute | 5.00 (3.50-9.00) | 5.00 (4.00-7.00) | 0.878 |
| Operation time, hour | 90.0 (65.0-120) | 92.0 (73.0-125) | 0.376 |
| IV tPA, n (%) | 29 (14.9) | 11 (20.0) | 0.489 |
| Occlusion site, n (%) |  |  | 0.297 |
| Cervical ICA | 76 (39.2) | 28 (50.9) | 0.161 |
| MCA-M1 | 96 (49.5) | 22 (40.0) | 0.276 |
| MCA M2 or ACA | 22 (11.3) | 5 (9.09) | 0.820 |
| Stroke subtype, n (%) |  |  | 0.923 |
| LAA | 131 (67.5) | 39 (70.9) | 0.755 |
| CE | 54 (27.8) | 14 (25.5) | 0.858 |
| Others | 9 (4.64) | 2 (3.64) | 1.000 |
| Laboratory data |  |  |  |
| FBG, mmol/L | 6.78 (5.80-8.27) | 7.75 (6.79-9.69) | 0.006 |
| TG, mg/dL | 108 (82.0-173) | 108 (68.5-163) | 0.489 |
| TC, mg/dL | 180 ± 42.5 | 177 ± 53.2 | 0.724 |
| HDL, mg/dL | 42.0 (36.0-51.0) | 42.5 (36.5-52.8) | 0.857 |
| Lymphocytes, 109/L | 1.39 (1.01-1.83) | 0.75 (0.50-1.38) | <0.001 |
| Neutrophils, 109/L | 7.46 (5.94-9.41) | 11.1 (8.05-13.5) | <0.001 |
| Monocytes, 109/L | 0.61 (0.44-0.75) | 0.69 (0.43-0.92) | 0.138 |
| Platelets, 109/L | 212 (174-252) | 211 (178-249) | 0.951 |
| Nutrition related index |  |  |  |
| CALLY Index | 0.92 (0.25-2.30) | 0.28 (0.07-0.84) | <0.001 |
| GNRI | 101 (95.0-107) | 99.1 (91.6-105) | 0.289 |
| PNI | 44.0 (41.0-48.3) | 41.0 (36.8-45.2) | <0.001 |
| CONUT, score | 2.00 (1.00-4.00) | 4.00 (2.00-5.00) | <0.001 |
| CAR | 0.17 (0.07-0.34) | 0.28 (0.12-0.94) | 0.005 |

Abbreviations: END early neurologic deterioration, BMI body mass index, NIHSS National Institutes of Health Stroke Scale, SBP systolic blood pressure, DBP diastolic blood pressure, OTT onset to treatment time, IV tPA intravenous tissue plasminogen activator, ICA internal carotid artery, MCA-M1 M1 segment of the middle cerebral artery, MCA-M2 M2 segment of the middle cerebral artery, ACA anterior cerebral artery, LAA large artery atherosclerosis, CE cardioembolic, FBG fasting blood glucose, TG triglycerides, TC total cholesterol, HDL high-density lipoprotein cholesterol, CALLY Index C-reactive protein-albumin-lymphocyte Index, GNRI Geriatric Nutritional Risk Index, PNI prognostic nutritional index, CONUT controlled nutritional status, CAR C-reactive protein-to-albumin ratio

**Supplement Table S4.** Characteristics of patients with and without malignant cerebral edema

| **Characteristics** | **Non-MCE(n = 201)** | **MCE(n = 48)** | ***P*** |
| --- | --- | --- | --- |
| Demographic data |  |  | 0.162 |
| Male sex, n (%) | 156 (77.6) | 32 (66.7) |  |
| Age, y | 62.4 ± 12.0 | 61.1 ± 15.1 | 0.575 |
| BMI, kg/m2 | 24.0 (22.4-26.0) | 23.5 (21.6-25.3) | 0.215 |
| Vascular risk factors, n(%) |  |  |  |
| Hypertension | 132 (65.7) | 28 (58.3) | 0.432 |
| Diabetes mellitus | 65 (32.3) | 14 (29.2) | 0.801 |
| Atrial fibrillation | 34 (16.9) | 13 (27.1) | 0.158 |
| Current smoking | 109 (54.2) | 22 (45.8) | 0.376 |
| Current drinking | 51 (25.4) | 13 (27.1) | 0.952 |
| Previous stroke | 39 (19.4) | 8 (16.7) | 0.818 |
| Clinical assessment |  |  |  |
| NIHSS, score | 10.0 (6.00-15.0) | 16.0 (12.0-18.0) | <0.001 |
| SBP, mmHg | 143 (133-159) | 140 (123-152) | 0.059 |
| DBP, mmHg | 84.6 ± 14.2 | 78.0 ± 13.2 | 0.003 |
| OTT, minute | 5.00 (3.50-9.00) | 5.00 (3.00-6.00) | 0.161 |
| Operation time, hour | 92.0 (69.5-121) | 85.0 (60.0-122) | 0.554 |
| IV tPA, n (%) | 31 (15.4) | 9 (18.8) | 0.730 |
| Occlusion site, n (%) |  |  | 0.012 |
| Cervical ICA | 76 (37.8) | 28 (58.3) | 0.015 |
| MCA-M1 | 99 (49.3) | 19 (39.6) | 0.296 |
| MCA M2 or ACA | 26 (12.9) | 1 (2.08) | 0.056 |
| Stroke subtype, n (%) |  |  | 0.007 |
| LAA | 146 (72.6) | 24 (50.0) | 0.004 |
| CE | 48 (23.9) | 20 (41.7) | 0.021 |
| Others | 7 (3.48) | 4 (8.33) | 0.231 |
| Laboratory data |  |  |  |
| FBG, mmol/L | 6.90 (5.82-8.44) | 7.64 (6.57-9.37) | 0.046 |
| TG, mg/dL | 108 (82.0-180) | 98.0 (71.0-143) | 0.134 |
| TC, mg/dL | 180 ± 44.0 | 174 ± 48.3 | 0.478 |
| HDL, mg/dL | 42.0 (36.0-49.8) | 44.0 (36.0-55.0) | 0.325 |
| Lymphocytes, 109/L | 1.41 (1.01-1.83) | 0.74 (0.53-1.02) | <0.001 |
| Neutrophils, 109/L | 7.57 (6.00-9.58) | 9.66 (7.71-13.3) | <0.001 |
| Monocytes, 109/L | 0.62 (0.45-0.76) | 0.58 (0.38-0.84) | 0.498 |
| Platelets, 109/L | 215 (179-256) | 194 (153-230) | 0.005 |
| Nutrition related index |  |  |  |
| CALLY Index | 0.83 (0.25-2.07) | 0.25 (0.08-1.23) | 0.001 |
| GNRI | 100 (94.3-107) | 100.0 (94.8-107) | 0.701 |
| PNI | 44.3 (40.8-48.1) | 41.0 (37.4-44.1) | <0.001 |
| CONUT, score | 2.00 (1.00-4.00) | 4.00 (3.00-5.00) | <0.001 |
| CAR | 0.17 (0.07-0.38) | 0.24 (0.10-0.88) | 0.111 |

Abbreviations: MCE malignant cerebral edema, BMI body mass index, NIHSS National Institutes of Health Stroke Scale, SBP systolic blood pressure, DBP diastolic blood pressure, OTT onset to treatment time, IV tPA intravenous tissue plasminogen activator, ICA internal carotid artery, MCA-M1 M1 segment of the middle cerebral artery, MCA-M2 M2 segment of the middle cerebral artery, ACA anterior cerebral artery, LAA large artery atherosclerosis, CE cardioembolic, FBG fasting blood glucose, TG triglycerides, TC total cholesterol, HDL high-density lipoprotein cholesterol**,** CALLY Index C-reactive protein-albumin-lymphocyte Index, GNRI Geriatric Nutritional Risk Index, PNI prognostic nutritional index, CONUT controlled nutritional status, CAR C-reactive protein-to-albumin ratio

**Supplement Table S5**. Characteristics of patients with and without stroke-associated pneumonia

| **Characteristics** | **Non-SAP(n = 143)** | **SAP(n = 106)** | ***P*** |
| --- | --- | --- | --- |
| Demographic data |  |  |  |
| Male sex, n (%) | 107 (74.8) | 81 (76.4) | 0.889 |
| Age, y | 60.6 (11.9) | 64.2 (13.4) | 0.029 |
| BMI, kg/m2 | 24.0 (22.4-26.0) | 23.9 (21.6-25.3) | 0.167 |
| Vascular risk factors, n(%) |  |  |  |
| Hypertension | 91 (63.6) | 69 (65.1) | 0.917 |
| Diabetes mellitus | 49 (34.3) | 30 (28.3) | 0.389 |
| Atrial fibrillation | 25 (17.5) | 22 (20.8) | 0.625 |
| Current smoking | 84 (58.7) | 47 (44.3) | 0.034 |
| Current drinking | 39 (27.3) | 25 (23.6) | 0.609 |
| Previous stroke | 27 (18.9) | 20 (18.9) | 1.000 |
| Clinical assessment |  |  |  |
| NIHSS, score | 8.00 (4.00-12.0) | 15.0 (11.0-18.0) | <0.001 |
| SBP, mmHg | 143 (133-160) | 143 (127-158) | 0.387 |
| DBP, mmHg | 85.9 (13.9) | 79.9 (14.0) | 0.001 |
| OTT, minute | 6.00 (3.50-9.00) | 5.00 (3.38-7.00) | 0.264 |
| Operation time, hour | 84.0 (61.5-110) | 104 (77.8-132) | 0.001 |
| IV tPA, n (%) | 21 (14.7) | 19 (17.9) | 0.607 |
| Occlusion site, n (%) |  |  | 0.008 |
| Cervical ICA | 51 (35.7) | 53 (50.0) | 0.033 |
| MCA-M1 | 70 (49.0) | 48 (45.3) | 0.656 |
| MCA M2 or ACA | 22 (15.4) | 5 (4.72) | 0.013 |
| Stroke subtype, n (%) |  |  | 0.493 |
| LAA | 101 (70.6) | 69 (65.1) | 0.429 |
| CE | 35 (24.5) | 33 (31.1) | 0.307 |
| Others | 7 (4.90) | 4 (3.77) | 0.763 |
| Laboratory data |  |  |  |
| FBG, mmol/L | 6.58 (5.70-8.32) | 7.34 (6.25-9.13) | 0.010 |
| TG, mg/dL | 111 (84.2-181) | 102 (73.0-154) | 0.160 |
| TC, mg/dL | 182 (45.5) | 175 (43.4) | 0.244 |
| HDL, mg/dL | 42.0 (36.0-50.5) | 44.0 (36.0-52.0) | 0.765 |
| Lymphocytes, 109/L | 1.50 (1.16-1.93) | 0.94 (0.66-1.39) | <0.001 |
| Neutrophils, 109/L | 7.01 (5.69-8.98) | 9.37 (7.50-12.3) | <0.001 |
| Monocytes, 109/L | 0.61 (0.44-0.73) | 0.67 (0.44-0.85) | 0.138 |
| Platelets, 109/L | 215 (181-252) | 205 (162-250) | 0.096 |
| Nutrition related index |  |  |  |
| CALLY Index | 1.05 (0.42-2.51) | 0.30 (0.09-1.27) | <0.001 |
| GNRI | 102 (95.4-107) | 98.2 (92.8-105) | 0.019 |
| PNI | 44.9 (41.6-49.1) | 41.8 (38.0-45.6) | <0.001 |
| CONUT, score | 2.00 (1.00-3.75) | 3.00 (2.00-4.00) | <0.001 |
| CAR | 0.15 (0.07-0.27) | 0.26 (0.10-0.91) | <0.001 |

Abbreviations: SAP stroke-associated pneumonia, BMI body mass index, NIHSS National Institutes of Health Stroke Scale, SBP systolic blood pressure, DBP diastolic blood pressure, OTT onset to treatment time, IV tPA intravenous tissue plasminogen activator, ICA internal carotid artery, MCA-M1 M1 segment of the middle cerebral artery, MCA-M2 M2 segment of the middle cerebral artery, ACA anterior cerebral artery, LAA large artery atherosclerosis, CE cardioembolic, FBG fasting blood glucose, TG triglycerides, TC total cholesterol, HDL high-density lipoprotein cholesterol**,** CALLY Index C-reactive protein-albumin-lymphocyte Index, GNRI Geriatric Nutritional Risk Index, PNI prognostic nutritional index, CONUT controlled nutritional status, CAR C-reactive protein-to-albumin ratio
